# Supplementary material
Source: PubMed Central journal article supplement (PMC5593082)
Supplement: NIHMS882870-supplement-Graphic_Abstract.pdf [file NIHMS882870-supplement-Graphic_Abstract.pdf]

Healthy

Patient with  
Pulmonary Arterial  
Hypertension

Patient with  
Pulmonary Arterial  
Hypertension and a  
BMPR2 mutation

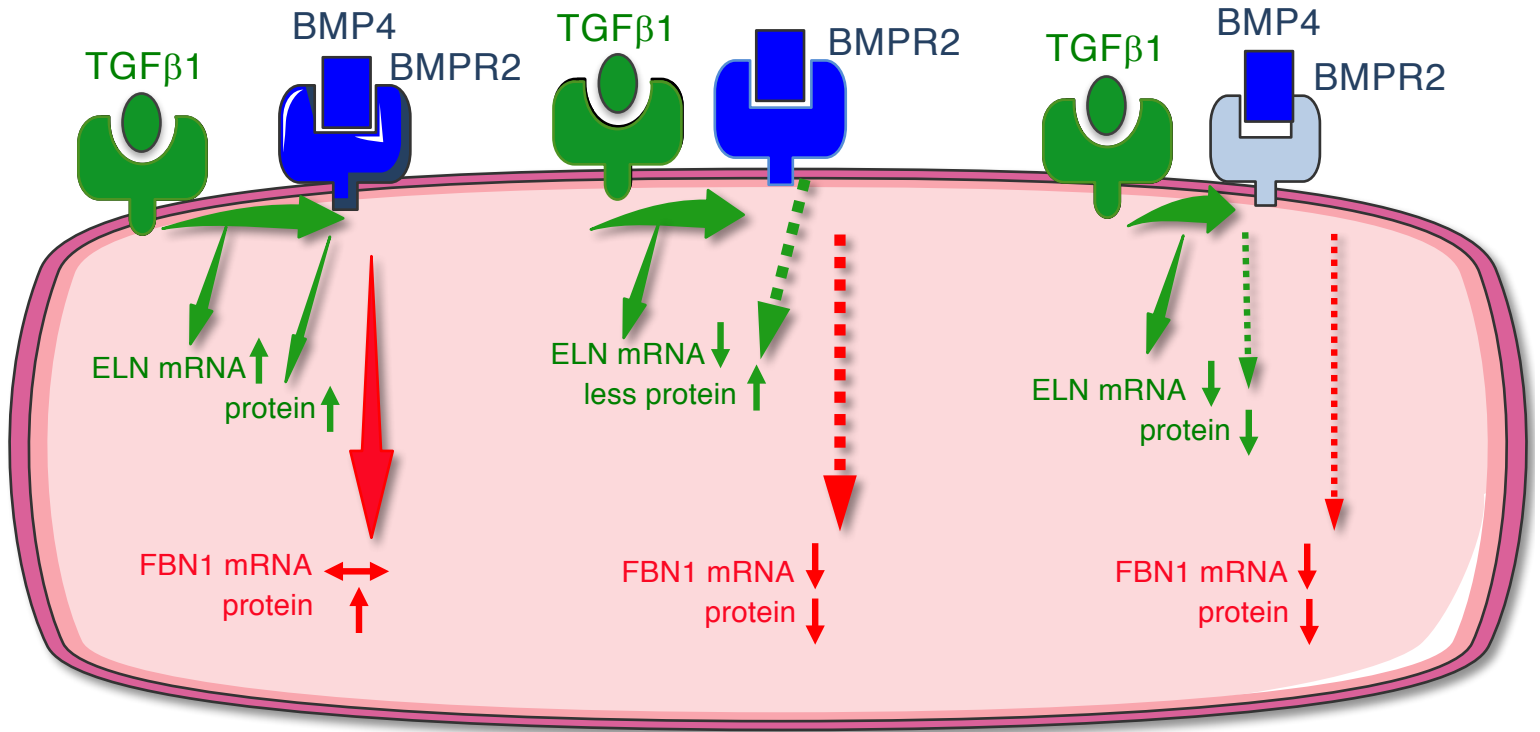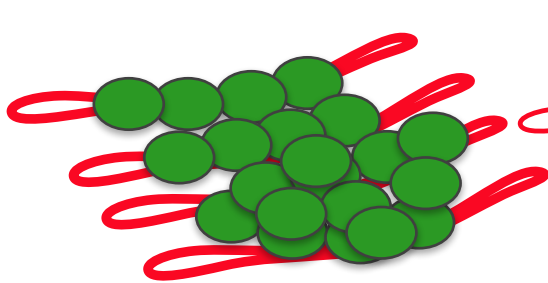

Well Assembled  
Elastic Fibers

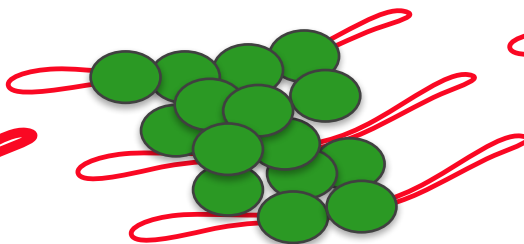

Impaired Formation of  
Elastic Fibers

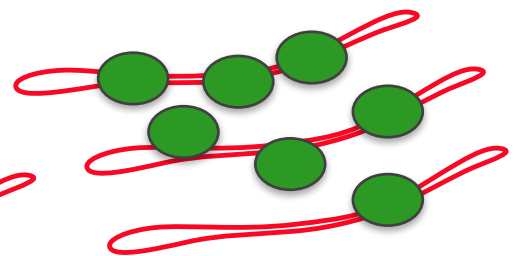

Poorly Assembled  
Elastic Fibers
